# Supplementary material
Source: publisher figshare collection journal article supplement (https://acs.figshare.com/ndownloader/files/11756006)
Supplement: Supplementary file 1 [file 11756006]

# Isothermal Flow-induced Crystallization of Polyamide 66 melts

*Jiho Seo<sup>1</sup>, Hideaki Takahashi<sup>2</sup>, Behzad Nazari<sup>1</sup>, Alicyn M. Rhoades<sup>3</sup>, Richard P. Schaake<sup>4</sup>, and  
Ralph H. Colby<sup>\*,1</sup>*

<sup>1</sup>Department of Materials Science and Engineering, Penn State University, University Park,  
Pennsylvania 16802, United States

<sup>2</sup>Toray Research Center Inc., Otsu, Shiga 520-8567, Japan

<sup>3</sup>School of Engineering, Penn State Behrend, Erie, Pennsylvania 16563, United States

<sup>4</sup>SKF Engineering and Research Centre, 3439 MT Nieuwegein, The Netherlands

## Supporting Information

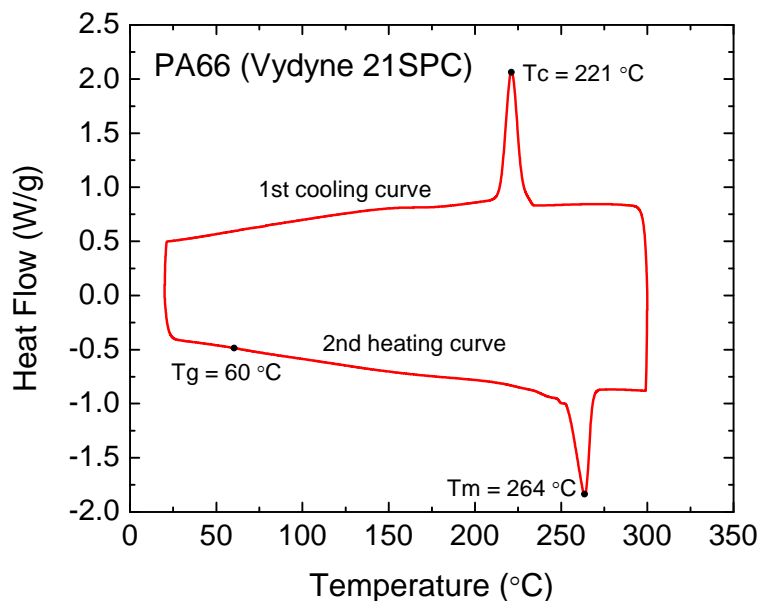

Figure S1. DSC 1<sup>st</sup> cooling and 2<sup>nd</sup> heating trace of polyamide 66 (Vydyne 21SPC). The cooling and heating rate were 10 °C/min. The  $T_g$ ,  $T_m$ , and  $T_c$  were 60, 264, and 221 °C, respectively.

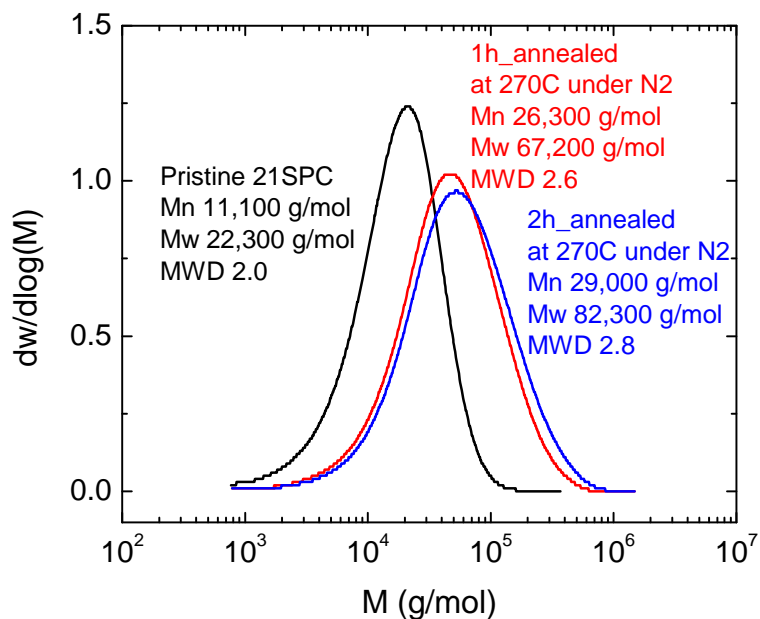

Figure S2. The molecular weight distributions of polyamide 66 (Vydyne 21SPC) pristine (black), annealed for 1 hour (red), and annealed 2 hours (blue) at 270 °C under N<sub>2</sub>, respectively. The

prepared PA66/HFIP solution (0.05 wt%) was filtered prior to SEC measurement in order to remove insoluble gels. The weight loss of 1 hour and 2 hours annealed PA 66 after the filter were 5.4 and 7.3 wt%, respectively.

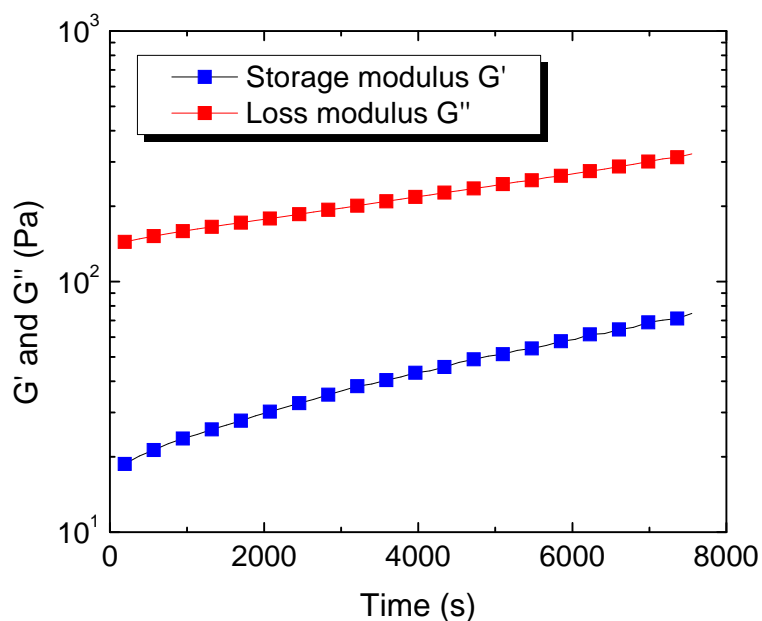

Figure S3. Oscillatory time sweep of polyamide 66 (Vydyne 21SPC) at 270 °C under N<sub>2</sub>. 25 mm cone and plate were used with a frequency of 0.05 rad/s and a strain amplitude of 0.05.

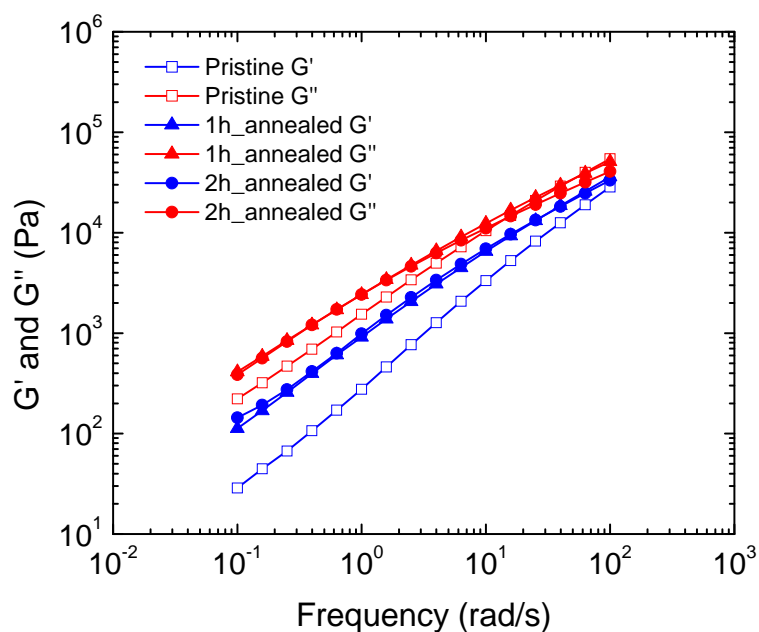

Figure S4. Linear viscoelastic behaviors of polyamide 66 (Vydyne 21SPC) pristine (open square), annealed for 1 hour (solid triangle), and annealed for 2 hours (solid circle) at 270 °C under N<sub>2</sub>, respectively. 8 mm parallel plates were used with a strain amplitude of 0.05.

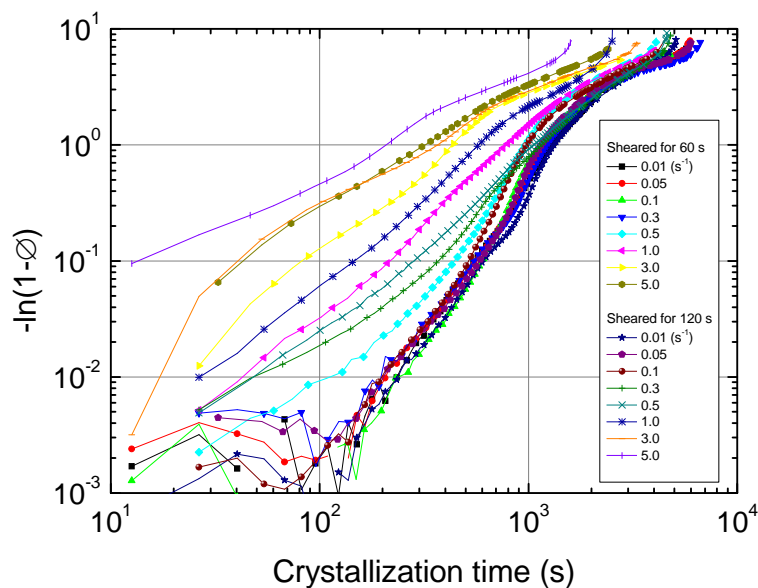

Figure S5. Avrami plot constructed with storage modulus evolution of PA 66 (Vydyne 21SPC) at  $T_c = 245$  °C as a function of crystallization time. The samples were prepared by shearing at  $T_s = 270$  °C for 60 s and 120 s using 8 mm parallel plates. The constant frequency of 1 rad/s was applied during crystallization with the constant strain amplitude of 0.05.
